# Supplementary material for: The nature of the Au–N bond in gold(iii) complexes with aromatic nitrogen-containing heterocycles: the influence of Au(iii) ions on the ligand aromaticity
Source: Royal Society of Chemistry journal article supplement (doi:10.1039/c7nj02634j), 2017-01-01
Supplement: c7nj02634j1.pdf [file c7nj02634j1.pdf]

*New Journal of Chemistry*

**Electronic Supplementary Information**

**The nature of Au—N bond in gold(III) complexes with aromatic nitrogen-containing heterocycles. The influence of Au(III) ion on the ligand aromaticity**

Slavko Radenković\*, Marija Antić, Nada D. Savić and Biljana Đ. Glišić

*University of Kragujevac, Faculty of Science, R. Domanovića 12, P. O. Box 60, 34000*

*Kragujevac, Serbia*

\*Corresponding author: E-mail address: [slavkoradenkovic@kg.ac.rs](mailto:slavkoradenkovic@kg.ac.rs)

## TABLE OF CONTENTS

Fig. S1 Optimized geometries of the studied gold(III) complexes obtained at the B3LYP/cc-pVTZ+LanL2TZ(f) level of theory.

Table S1 Results of the NBO, AIM, EDA and CDA methods obtained for the experimental X-ray structure of **1**.

Table S2 Cartesian coordinates of the optimized geometries of the studied ligands and their gold(III) complexes obtained at the B3LYP/cc-pVTZ+LanL2TZ(f) level of theory.

Table S3 Complete reference 39.

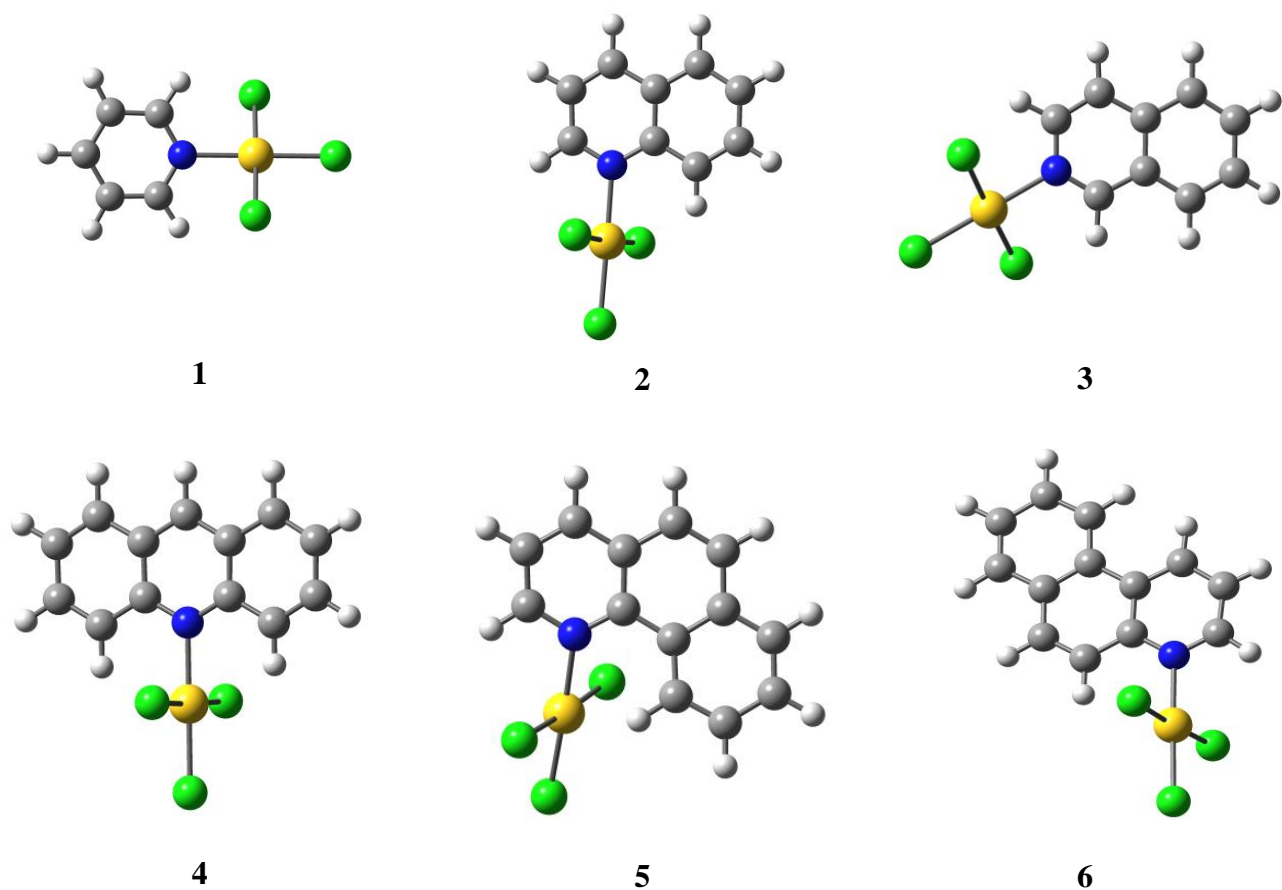

Fig. S1 Optimized geometries of the studied gold(III) complexes obtained at the B3LYP/cc-pVTZ+LanL2TZ(f) level of theory.

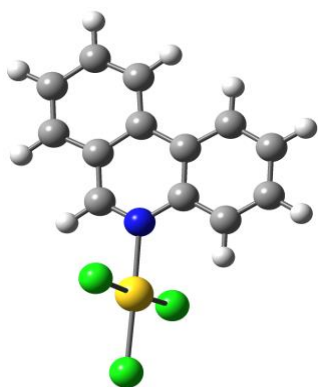

7

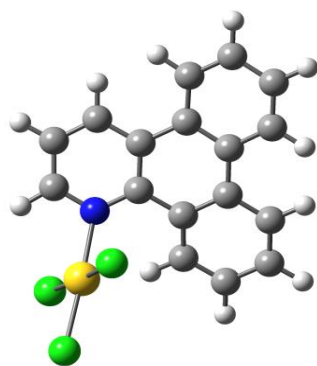

8

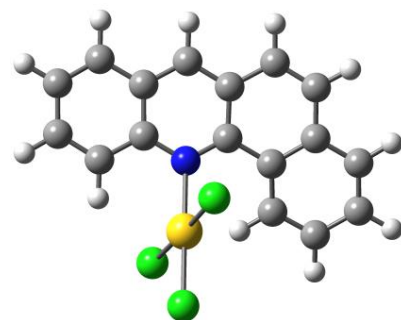

9

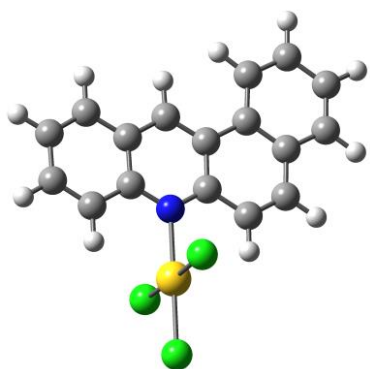

10

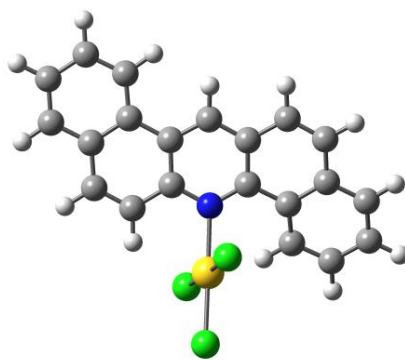

11

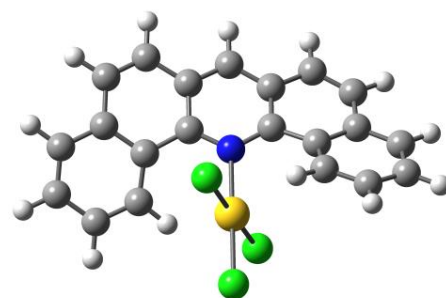

12

Fig. S1 Continued.

Table S1 Results of the NBO, AIM, EDA and CDA methods obtained for the experimental X-ray structure of **1**.

| NBO  |                  | AIM    |                       | EDA                           |                           | CDA        |                   |
|------|------------------|--------|-----------------------|-------------------------------|---------------------------|------------|-------------------|
| atom | charge<br>(a.u.) | bond   | $\rho(r_c)$<br>(a.u.) | $\nabla^2\rho(r_c)$<br>(a.u.) |                           | (kcal/mol) | (a.u.)            |
| Au   | 0.5518           | Au-N   | 0.1387                | 0.4278                        | $\Delta E_{\text{int}}$   | -45.23     | <i>d</i> 0.1024   |
| N    | -0.4378          | Au-Cl1 | 0.1075                | 0.1817                        | $\Delta E_{\text{es}}$    | -123.71    | <i>b</i> 0.0342   |
| Cl1  | -0.3128          | Au-Cl2 | 0.1144                | 0.1715                        | $\Delta E_{\text{Pauli}}$ | 175.5      | <i>d-b</i> 0.0682 |
| Cl2  | -0.2547          | N-C1   | 0.3022                | -0.8184                       | $\Delta E_{\text{pol}}$   | -83.02     | <i>r</i> -0.4369  |
| C1   | 0.0881           | C1-C2  | 0.3217                | -1.0651                       | $\Delta E_{\text{disp}}$  | -14.01     |                   |
| C2   | -0.2275          | C2-C3  | 0.3208                | -1.0654                       |                           |            |                   |
| C3   | -0.1269          |        |                       |                               |                           |            |                   |

Table S2 Cartesian coordinates of the optimized geometries of the studied ligands and their gold(III) complexes obtained at the B3LYP/cc-pVTZ+LanL2TZ(f) level of theory.

| <b>L1</b> |          |          |         |
|-----------|----------|----------|---------|
| C         | 1.13904  | 0.71949  | 0.00000 |
| C         | 1.19341  | -0.66977 | 0.00000 |
| C         | 0.00000  | -1.37903 | 0.00000 |
| C         | -1.19341 | -0.66977 | 0.00000 |
| C         | -1.13904 | 0.71949  | 0.00000 |
| N         | 0.00000  | 1.41272  | 0.00000 |
| H         | 0.00000  | -2.46106 | 0.00000 |
| H         | 2.05342  | 1.30256  | 0.00000 |
| H         | 2.14805  | -1.17781 | 0.00000 |
| H         | -2.14805 | -1.17781 | 0.00000 |
| H         | -2.05342 | 1.30256  | 0.00000 |
| <b>L2</b> |          |          |         |
| C         | 2.41363  | 0.65058  | 0.00000 |
| C         | 1.26143  | 1.38820  | 0.00000 |
| C         | 0.01424  | 0.72437  | 0.00000 |
| C         | 0.02854  | -0.70231 | 0.00000 |
| C         | 2.31836  | -0.75899 | 0.00000 |
| H         | -1.23466 | 2.48492  | 0.00000 |
| H         | 3.38611  | 1.12322  | 0.00000 |
| H         | 1.28982  | 2.47091  | 0.00000 |
| C         | -1.22794 | 1.40197  | 0.00000 |
| C         | -1.20254 | -1.39959 | 0.00000 |
| H         | 3.22513  | -1.35562 | 0.00000 |
| C         | -2.38921 | -0.71428 | 0.00000 |
| C         | -2.40348 | 0.69795  | 0.00000 |
| H         | -1.16716 | -2.48003 | 0.00000 |
| H         | -3.32622 | -1.25516 | 0.00000 |
| H         | -3.34967 | 1.22227  | 0.00000 |
| N         | 1.18550  | -1.41969 | 0.00000 |
| <b>L3</b> |          |          |         |
| C         | -2.41186 | 0.61571  | 0.00000 |
| C         | -1.26884 | 1.37012  | 0.00000 |
| C         | -0.01016 | 0.72649  | 0.00000 |
| C         | -0.00859 | -0.69622 | 0.00000 |
| H         | 1.23513  | 2.49241  | 0.00000 |
| H         | -3.38586 | 1.08973  | 0.00000 |
| H         | -1.32703 | 2.45089  | 0.00000 |
| C         | 1.22942  | 1.40993  | 0.00000 |
| C         | 1.22120  | -1.39346 | 0.00000 |

|           |          |          |         |
|-----------|----------|----------|---------|
| C         | 2.40593  | -0.70501 | 0.00000 |
| C         | 2.40682  | 0.70770  | 0.00000 |
| H         | 1.21150  | -2.47620 | 0.00000 |
| H         | 3.34655  | -1.23901 | 0.00000 |
| H         | 3.35062  | 1.23680  | 0.00000 |
| N         | -2.42145 | -0.74176 | 0.00000 |
| C         | -1.26335 | -1.35533 | 0.00000 |
| H         | -1.28417 | -2.44184 | 0.00000 |
| <b>L4</b> |          |          |         |
| C         | 3.57408  | -0.76588 | 0.00000 |
| C         | 2.37797  | -1.42041 | 0.00000 |
| C         | 1.15145  | -0.69418 | 0.00000 |
| C         | 1.20713  | 0.74492  | 0.00000 |
| C         | 2.47774  | 1.38819  | 0.00000 |
| C         | 3.62704  | 0.65492  | 0.00000 |
| C         | 0.00000  | 1.43816  | 0.00000 |
| C         | -1.20713 | 0.74492  | 0.00000 |
| C         | -1.15145 | -0.69418 | 0.00000 |
| C         | -2.37797 | -1.42041 | 0.00000 |
| H         | -2.31750 | -2.49971 | 0.00000 |
| C         | -3.57408 | -0.76588 | 0.00000 |
| C         | -3.62704 | 0.65492  | 0.00000 |
| C         | -2.47774 | 1.38819  | 0.00000 |
| H         | 4.49819  | -1.32868 | 0.00000 |
| H         | 2.31750  | -2.49971 | 0.00000 |
| H         | 2.51286  | 2.47054  | 0.00000 |
| H         | 4.58854  | 1.15045  | 0.00000 |
| H         | 0.00000  | 2.52228  | 0.00000 |
| H         | -4.49819 | -1.32868 | 0.00000 |
| H         | -4.58854 | 1.15045  | 0.00000 |
| H         | -2.51286 | 2.47054  | 0.00000 |
| N         | 0.00000  | -1.37530 | 0.00000 |
| <b>L5</b> |          |          |         |
| C         | 3.48459  | -0.38259 | 0.00000 |
| C         | 2.84049  | 0.83086  | 0.00000 |
| C         | 1.43506  | 0.87098  | 0.00000 |
| C         | 0.73987  | -0.36565 | 0.00000 |
| H         | 1.25130  | 3.03031  | 0.00000 |
| H         | 4.56356  | -0.44990 | 0.00000 |
| H         | 3.39933  | 1.75863  | 0.00000 |
| C         | 0.70051  | 2.09799  | 0.00000 |
| C         | -0.70881 | -0.36569 | 0.00000 |
| C         | -1.39847 | 0.87379  | 0.00000 |
| C         | -0.65422 | 2.09705  | 0.00000 |

|           |          |          |          |
|-----------|----------|----------|----------|
| H         | -1.20157 | 3.03123  | 0.00000  |
| C         | -1.44915 | -1.56171 | 0.00000  |
| C         | -2.82564 | -1.53475 | 0.00000  |
| H         | -3.38285 | -2.46212 | 0.00000  |
| C         | -2.80792 | 0.87240  | 0.00000  |
| C         | -3.51118 | -0.30989 | 0.00000  |
| H         | -4.59302 | -0.29721 | 0.00000  |
| H         | -0.90907 | -2.49668 | 0.00000  |
| H         | -3.33168 | 1.82005  | 0.00000  |
| N         | 1.38761  | -1.55006 | 0.00000  |
| C         | 2.70543  | -1.54977 | 0.00000  |
| H         | 3.18727  | -2.52204 | 0.00000  |
| <b>L6</b> |          |          |          |
| C         | 2.87867  | -1.48348 | 0.00000  |
| C         | 1.50681  | -1.56873 | 0.00000  |
| C         | 0.73049  | -0.39596 | 0.00000  |
| C         | 1.43780  | 0.83564  | 0.00000  |
| H         | 3.49376  | -2.37267 | 0.00000  |
| H         | 1.03339  | -2.53999 | 0.00000  |
| C         | -0.71997 | -0.38615 | 0.00000  |
| C         | 0.71344  | 2.06876  | 0.00000  |
| C         | -0.63989 | 2.07820  | 0.00000  |
| C         | -1.39630 | 0.86300  | 0.00000  |
| H         | 1.29324  | 2.98092  | 0.00000  |
| H         | -1.18051 | 3.01640  | 0.00000  |
| C         | -2.80523 | 0.88862  | 0.00000  |
| C         | -1.49654 | -1.56193 | 0.00000  |
| C         | -3.53606 | -0.27586 | 0.00000  |
| H         | -4.61716 | -0.24177 | 0.00000  |
| C         | -2.87259 | -1.51107 | 0.00000  |
| H         | -3.44398 | -2.42961 | 0.00000  |
| H         | -1.01256 | -2.52779 | 0.00000  |
| H         | -3.30674 | 1.84818  | 0.00000  |
| N         | 2.78971  | 0.90961  | 0.00000  |
| C         | 3.47540  | -0.21425 | 0.00000  |
| H         | 4.55655  | -0.12172 | 0.00000  |
| <b>L7</b> |          |          |          |
| C         | 1.37901  | 0.86135  | 0.00001  |
| C         | 0.72038  | -0.39605 | 0.00007  |
| C         | -0.72638 | -0.40332 | -0.00001 |
| C         | -1.38560 | 0.84855  | -0.00015 |
| H         | -1.04694 | -2.54198 | 0.00015  |
| C         | -1.51709 | -1.56933 | 0.00005  |
| C         | -2.79121 | 0.90999  | -0.00023 |



|           |          |          |          |
|-----------|----------|----------|----------|
| C         | -3.53949 | -0.24327 | -0.00018 |
| C         | -2.89205 | -1.48901 | -0.00004 |
| H         | -3.27310 | 1.87980  | -0.00034 |
| H         | -4.61991 | -0.19577 | -0.00024 |
| H         | -3.48076 | -2.39679 | 0.00000  |
| N         | 0.70437  | 2.06465  | -0.00013 |
| C         | -0.58868 | 2.03946  | -0.00020 |
| H         | -1.10180 | 2.99857  | -0.00031 |
| C         | 1.51030  | -1.56235 | 0.00021  |
| C         | 2.78575  | 0.91169  | 0.00008  |
| C         | 3.53038  | -0.24387 | 0.00022  |
| H         | 4.61103  | -0.19519 | 0.00027  |
| C         | 2.88534  | -1.48994 | 0.00029  |
| H         | 3.47126  | -2.39933 | 0.00039  |
| H         | 1.03574  | -2.53337 | 0.00027  |
| H         | 3.24983  | 1.88807  | 0.00003  |
| <b>L8</b> |          |          |          |
| C         | -0.62820 | 3.66078  | 0.00096  |
| C         | 0.45733  | 2.81422  | 0.00122  |
| C         | 0.27009  | 1.42230  | 0.00028  |
| C         | -1.06407 | 0.95963  | -0.00050 |
| H         | -0.50116 | 4.73436  | 0.00172  |
| H         | 1.45202  | 3.23386  | 0.00228  |
| C         | 1.37441  | 0.46728  | 0.00012  |
| C         | -1.34375 | -0.47129 | -0.00054 |
| C         | -0.28033 | -1.39999 | 0.00046  |
| C         | 1.10295  | -0.92287 | 0.00034  |
| C         | 2.19172  | -1.81470 | 0.00003  |
| C         | 2.71472  | 0.89534  | -0.00051 |
| C         | 3.49588  | -1.37054 | -0.00045 |
| H         | 4.30893  | -2.08399 | -0.00075 |
| C         | 3.76146  | -0.00009 | -0.00076 |
| H         | 4.78155  | 0.35954  | -0.00133 |
| H         | 2.94127  | 1.95071  | -0.00103 |
| H         | 2.01298  | -2.87860 | -0.00002 |
| N         | -2.11981 | 1.79684  | -0.00087 |
| C         | -1.90651 | 3.09817  | -0.00025 |
| H         | -2.78641 | 3.73284  | -0.00064 |
| C         | -0.60237 | -2.77075 | 0.00132  |
| C         | -2.67218 | -0.92891 | -0.00115 |
| C         | -1.91119 | -3.20328 | 0.00083  |
| H         | -2.12492 | -4.26393 | 0.00155  |
| C         | -2.95710 | -2.27608 | -0.00057 |

|            |          |          |          |
|------------|----------|----------|----------|
| H          | -3.98460 | -2.61439 | -0.00109 |
| H          | 0.18199  | -3.51173 | 0.00251  |
| H          | -3.46029 | -0.19182 | -0.00199 |
| <b>L9</b>  |          |          |          |
| C          | -2.68245 | 0.66895  | 0.00000  |
| C          | -1.71120 | -0.36110 | 0.00000  |
| C          | -0.29612 | -0.00885 | 0.00000  |
| C          | 0.07012  | 1.38055  | 0.00000  |
| C          | -0.95630 | 2.38402  | 0.00000  |
| C          | -2.26364 | 2.04455  | 0.00000  |
| C          | 1.41895  | 1.69486  | 0.00000  |
| C          | 2.38325  | 0.68255  | 0.00000  |
| C          | 1.91434  | -0.67154 | 0.00000  |
| C          | 2.86987  | -1.72283 | 0.00000  |
| H          | 2.49931  | -2.73833 | 0.00000  |
| C          | 4.20831  | -1.44557 | 0.00000  |
| C          | 4.67079  | -0.10559 | 0.00000  |
| C          | 3.78129  | 0.93152  | 0.00000  |
| H          | -0.65665 | 3.42456  | 0.00000  |
| H          | -3.02782 | 2.81146  | 0.00000  |
| H          | 1.73018  | 2.73330  | 0.00000  |
| H          | 4.92758  | -2.25379 | 0.00000  |
| H          | 5.73454  | 0.09046  | 0.00000  |
| H          | 4.12936  | 1.95698  | 0.00000  |
| N          | 0.60516  | -0.98189 | 0.00000  |
| C          | -2.13337 | -1.69932 | 0.00000  |
| C          | -4.04575 | 0.32362  | 0.00000  |
| C          | -4.43953 | -0.99730 | 0.00000  |
| H          | -5.49172 | -1.24915 | 0.00000  |
| C          | -3.47644 | -2.01405 | 0.00000  |
| H          | -3.78753 | -3.05020 | 0.00000  |
| H          | -1.37999 | -2.47275 | 0.00000  |
| H          | -4.78602 | 1.11371  | 0.00000  |
| <b>L10</b> |          |          |          |
| C          | -1.37221 | -4.48512 | 0.00000  |
| C          | -0.16428 | -3.84631 | 0.00000  |
| C          | -0.09967 | -2.42678 | 0.00000  |
| C          | -1.32173 | -1.68145 | 0.00000  |
| C          | -2.55805 | -2.38026 | 0.00000  |
| C          | -2.58261 | -3.74638 | 0.00000  |
| C          | -1.23165 | -0.28519 | 0.00000  |
| C          | 0.00000  | 0.34761  | 0.00000  |
| C          | 1.16317  | -0.49910 | 0.00000  |
| C          | 2.46765  | 0.10375  | 0.00000  |
| H          | 3.31546  | -0.56650 | 0.00000  |
| C          | 2.61560  | 1.44489  | 0.00000  |

|            |          |          |          |
|------------|----------|----------|----------|
| C          | 1.48404  | 2.33154  | 0.00000  |
| C          | 0.17120  | 1.79615  | 0.00000  |
| H          | -1.41232 | -5.56631 | 0.00000  |
| H          | 0.76950  | -4.39082 | 0.00000  |
| H          | -3.48002 | -1.81204 | 0.00000  |
| H          | -3.52748 | -4.27292 | 0.00000  |
| H          | -2.14968 | 0.28646  | 0.00000  |
| H          | 3.60504  | 1.88488  | 0.00000  |
| N          | 1.10338  | -1.82833 | 0.00000  |
| C          | -0.91008 | 2.69436  | 0.00000  |
| C          | 1.66557  | 3.72571  | 0.00000  |
| C          | -0.70995 | 4.05961  | 0.00000  |
| H          | -1.56163 | 4.72655  | 0.00000  |
| H          | -1.92353 | 2.32031  | 0.00000  |
| H          | 2.67454  | 4.11832  | 0.00000  |
| C          | 0.58729  | 4.58308  | 0.00000  |
| H          | 0.74090  | 5.65369  | 0.00000  |
| <b>L11</b> |          |          |          |
| C          | -3.64417 | 0.85128  | -0.00002 |
| C          | -2.80780 | -0.29252 | 0.00004  |
| C          | -1.36458 | -0.11439 | 0.00015  |
| C          | -0.82810 | 1.20813  | 0.00016  |
| C          | -1.71540 | 2.33326  | 0.00014  |
| C          | -3.05702 | 2.16148  | 0.00006  |
| C          | 0.55687  | 1.34963  | 0.00015  |
| C          | 1.39155  | 0.23699  | 0.00014  |
| C          | 0.74979  | -1.04109 | 0.00019  |
| C          | 1.55129  | -2.23000 | 0.00020  |
| H          | 1.02902  | -3.17624 | 0.00027  |
| C          | 2.90085  | -2.15922 | 0.00010  |
| C          | 3.58914  | -0.90020 | -0.00001 |
| C          | 2.84457  | 0.30776  | 0.00003  |
| H          | -1.28718 | 3.32790  | 0.00018  |
| H          | -3.71805 | 3.01891  | 0.00004  |
| H          | 0.96875  | 2.34968  | 0.00012  |
| H          | 3.49535  | -3.06429 | 0.00009  |
| N          | -0.57970 | -1.19061 | 0.00019  |
| C          | 3.55287  | 1.52340  | -0.00007 |
| C          | 4.99538  | -0.84863 | -0.00017 |
| C          | 5.66203  | 0.35573  | -0.00029 |
| H          | 6.74334  | 0.38111  | -0.00042 |
| C          | 4.93138  | 1.55022  | -0.00023 |
| H          | 5.44954  | 2.49981  | -0.00031 |
| H          | 3.01625  | 2.46107  | -0.00002 |
| H          | 5.54935  | -1.77889 | -0.00020 |
| C          | -3.39310 | -1.56919 | -0.00003 |

|            |          |          |          |
|------------|----------|----------|----------|
| C          | -5.04069 | 0.67661  | -0.00016 |
| C          | -4.76389 | -1.71424 | -0.00018 |
| H          | -5.20155 | -2.70362 | -0.00024 |
| H          | -2.74116 | -2.42992 | 0.00002  |
| H          | -5.67753 | 1.55226  | -0.00021 |
| C          | -5.59412 | -0.58480 | -0.00025 |
| H          | -6.66937 | -0.70474 | -0.00037 |
| <b>L12</b> |          |          |          |
| C          | 0.00000  | 3.63252  | -0.25093 |
| C          | 0.00000  | 2.40193  | 0.45241  |
| C          | 0.00000  | 1.15587  | -0.29794 |
| C          | 0.00000  | 1.20853  | -1.72530 |
| C          | 0.00000  | 2.47752  | -2.39052 |
| C          | 0.00000  | 3.63195  | -1.68630 |
| C          | 0.00000  | 0.00000  | -2.41369 |
| C          | 0.00000  | -1.20853 | -1.72530 |
| C          | 0.00000  | -1.15587 | -0.29794 |
| C          | 0.00000  | -2.40193 | 0.45241  |
| C          | 0.00000  | -3.63252 | -0.25093 |
| C          | 0.00000  | -3.63195 | -1.68630 |
| C          | 0.00000  | -2.47752 | -2.39052 |
| H          | 0.00000  | 2.49153  | -3.47324 |
| H          | 0.00000  | 4.58547  | -2.19906 |
| H          | 0.00000  | 0.00000  | -3.49769 |
| H          | 0.00000  | -4.58547 | -2.19906 |
| H          | 0.00000  | -2.49153 | -3.47324 |
| N          | 0.00000  | 0.00000  | 0.36817  |
| C          | 0.00000  | 2.41930  | 1.85704  |
| C          | 0.00000  | 4.83711  | 0.47718  |
| C          | 0.00000  | 4.83013  | 1.85430  |
| H          | 0.00000  | 5.76343  | 2.40150  |
| H          | 0.00000  | 1.47536  | 2.38068  |
| H          | 0.00000  | 5.77492  | -0.06393 |
| C          | 0.00000  | -2.41930 | 1.85704  |
| C          | 0.00000  | -4.83711 | 0.47718  |
| C          | 0.00000  | -4.83013 | 1.85430  |
| H          | 0.00000  | -5.76343 | 2.40150  |
| H          | 0.00000  | -1.47536 | 2.38068  |
| H          | 0.00000  | -5.77492 | -0.06393 |
| C          | 0.00000  | 3.61197  | 2.54769  |
| C          | 0.00000  | -3.61197 | 2.54769  |
| H          | 0.00000  | -3.60880 | 3.62954  |
| H          | 0.00000  | 3.60880  | 3.62954  |
| <b>1</b>   |          |          |          |
| C          | -3.51972 | 0.93092  | 0.74880  |
| C          | -3.51973 | -0.93091 | -0.74878 |

|          |          |          |          |
|----------|----------|----------|----------|
| C        | -2.13708 | 0.91108  | 0.72019  |
| N        | -1.46504 | 0.00001  | -0.00001 |
| C        | -2.13710 | -0.91106 | -0.72020 |
| H        | -4.02394 | 1.67401  | 1.34835  |
| H        | -1.54405 | 1.63337  | 1.25755  |
| H        | -4.02397 | -1.67400 | -1.34831 |
| H        | -1.54407 | -1.63336 | -1.25757 |
| Au       | 0.63159  | 0.00000  | 0.00000  |
| Cl       | 0.60534  | -2.29910 | 0.31802  |
| Cl       | 0.60538  | 2.29910  | -0.31805 |
| Cl       | 2.90904  | -0.00001 | 0.00003  |
| C        | -4.22528 | 0.00001  | 0.00002  |
| H        | -5.30648 | 0.00000  | 0.00003  |
| <b>2</b> |          |          |          |
| C        | -2.36192 | 2.40125  | 0.92853  |
| C        | -3.27169 | 0.33197  | 0.10610  |
| C        | -1.08167 | 1.87121  | 0.72946  |
| N        | -0.88265 | 0.65487  | 0.25482  |
| C        | -1.94242 | -0.15189 | -0.07109 |
| H        | -2.46085 | 3.40191  | 1.32096  |
| H        | -0.20201 | 2.45345  | 0.95983  |
| Au       | 1.09989  | 0.03380  | 0.02151  |
| Cl       | 0.96573  | -0.97917 | 2.10629  |
| Cl       | 1.11879  | 1.09562  | -2.04261 |
| Cl       | 3.27468  | -0.60482 | -0.21876 |
| C        | -3.45128 | 1.63304  | 0.61680  |
| H        | -4.45533 | 2.01187  | 0.75673  |
| C        | -4.35795 | -0.50750 | -0.23582 |
| C        | -1.74095 | -1.45064 | -0.57940 |
| C        | -2.81832 | -2.23485 | -0.89928 |
| H        | -2.65331 | -3.22995 | -1.28822 |
| C        | -4.13676 | -1.76468 | -0.72837 |
| H        | -4.97010 | -2.40241 | -0.98798 |
| H        | -0.73508 | -1.82022 | -0.71047 |
| H        | -5.36427 | -0.13437 | -0.09951 |
| <b>3</b> |          |          |          |
| C        | -2.92351 | -0.41916 | -0.29197 |
| C        | -2.49424 | 1.61205  | 0.95696  |
| C        | -1.52843 | -0.58720 | -0.36311 |
| N        | -0.68526 | 0.27947  | 0.16737  |
| C        | -1.15781 | 1.37999  | 0.82445  |
| H        | -1.10301 | -1.45416 | -0.84594 |
| H        | -2.82785 | 2.49027  | 1.49139  |
| H        | -0.41338 | 2.05458  | 1.21267  |
| Au       | 1.37920  | -0.02896 | 0.00383  |
| Cl       | 1.62473  | 2.17454  | -0.67878 |

|          |          |          |          |
|----------|----------|----------|----------|
| Cl       | 1.07609  | -2.22885 | 0.67928  |
| Cl       | 3.62683  | -0.36153 | -0.17887 |
| C        | -3.43319 | 0.71834  | 0.39418  |
| C        | -4.83239 | 0.89564  | 0.47466  |
| C        | -5.67423 | -0.01903 | -0.10446 |
| C        | -5.16583 | -1.14835 | -0.78433 |
| H        | -5.85179 | -1.85508 | -1.23017 |
| H        | -5.22754 | 1.75805  | 0.99444  |
| H        | -6.74487 | 0.12208  | -0.04186 |
| C        | -3.81471 | -1.34940 | -0.87783 |
| H        | -3.41561 | -2.21250 | -1.39355 |
| <b>4</b> |          |          |          |
| C        | -2.89877 | 1.20902  | 0.00611  |
| C        | -2.89905 | -1.20851 | -0.00562 |
| C        | -1.46359 | 1.18146  | 0.00681  |
| N        | -0.80242 | 0.00000  | 0.00049  |
| C        | -1.46387 | -1.18129 | -0.00600 |
| Au       | 1.29621  | -0.00012 | -0.00002 |
| Cl       | 1.24038  | -0.03898 | 2.32184  |
| Cl       | 3.58082  | 0.00009  | -0.00067 |
| Cl       | 1.23914  | 0.03849  | -2.32178 |
| C        | -3.58286 | 0.00034  | 0.00022  |
| H        | -4.66609 | 0.00046  | 0.00008  |
| C        | -3.57378 | -2.46121 | -0.01160 |
| C        | -0.76846 | -2.41728 | -0.01329 |
| C        | -1.45547 | -3.59718 | -0.01913 |
| H        | -0.90505 | -4.52783 | -0.02454 |
| C        | -2.87232 | -3.62811 | -0.01808 |
| H        | -3.38696 | -4.57854 | -0.02255 |
| H        | 0.31075  | -2.41926 | -0.01388 |
| H        | -4.65571 | -2.46097 | -0.01088 |
| C        | -0.76791 | 2.41730  | 0.01400  |
| C        | -3.57321 | 2.46188  | 0.01145  |
| C        | -2.87148 | 3.62862  | 0.01756  |
| H        | -3.38590 | 4.57917  | 0.02133  |
| C        | -1.45464 | 3.59737  | 0.01911  |
| H        | -0.90400 | 4.52788  | 0.02430  |
| H        | 0.31131  | 2.41905  | 0.01503  |
| H        | -4.65513 | 2.46189  | 0.01042  |
| <b>5</b> |          |          |          |
| C        | -1.02504 | 3.47369  | -0.23237 |
| C        | -2.66486 | 1.73452  | 0.03216  |
| C        | -0.06138 | 2.47893  | -0.33329 |
| N        | -0.35618 | 1.18029  | -0.27799 |
| C        | -1.65305 | 0.75760  | -0.18464 |
| Au       | 1.37187  | 0.02243  | 0.08514  |

|          |          |          |          |
|----------|----------|----------|----------|
| Cl       | 0.68764  | -0.17776 | 2.29467  |
| Cl       | 3.28588  | -1.13388 | 0.53071  |
| Cl       | 2.00547  | 0.32833  | -2.13405 |
| C        | -2.32466 | 3.09378  | -0.00532 |
| H        | -3.10022 | 3.83299  | 0.14653  |
| C        | -4.00529 | 1.32620  | 0.30948  |
| C        | -2.03523 | -0.63515 | -0.29972 |
| C        | -3.37383 | -0.99250 | 0.03054  |
| C        | -4.33159 | 0.01639  | 0.35548  |
| H        | -5.33979 | -0.29121 | 0.59943  |
| H        | -4.74314 | 2.09338  | 0.50184  |
| H        | -0.72867 | 4.51004  | -0.28762 |
| H        | 0.98232  | 2.73028  | -0.44141 |
| C        | -3.76520 | -2.34360 | -0.02125 |
| C        | -1.18519 | -1.64981 | -0.78125 |
| C        | -1.59939 | -2.96091 | -0.84357 |
| H        | -0.92142 | -3.71364 | -1.22076 |
| C        | -2.89004 | -3.31909 | -0.43562 |
| H        | -3.20351 | -4.35333 | -0.47315 |
| H        | -4.77969 | -2.59886 | 0.25542  |
| H        | -0.20443 | -1.40797 | -1.15654 |
| <b>6</b> |          |          |          |
| C        | -1.17324 | 2.90714  | 0.70632  |
| C        | -2.44411 | 0.91732  | 0.20716  |
| C        | -0.00601 | 2.17496  | 0.52724  |
| N        | -0.03096 | 0.88598  | 0.21358  |
| C        | -1.21277 | 0.22587  | 0.04333  |
| Au       | 1.82749  | -0.05416 | 0.00331  |
| Cl       | 1.56696  | -0.93811 | 2.13535  |
| Cl       | 3.87397  | -1.03620 | -0.21554 |
| Cl       | 1.99705  | 0.90223  | -2.10535 |
| C        | -2.38516 | 2.27668  | 0.54643  |
| H        | -3.29459 | 2.84176  | 0.68292  |
| C        | -3.69113 | 0.20006  | 0.01733  |
| C        | -1.20934 | -1.15498 | -0.30252 |
| C        | -2.37706 | -1.81705 | -0.47904 |
| C        | -3.64310 | -1.17491 | -0.32752 |
| H        | -1.10913 | 3.95328  | 0.96427  |
| H        | 0.96547  | 2.63310  | 0.63208  |
| H        | -2.36210 | -2.86660 | -0.74179 |
| H        | -0.26572 | -1.66600 | -0.41498 |
| C        | -4.84205 | -1.88955 | -0.51678 |
| C        | -4.95402 | 0.80702  | 0.15911  |
| C        | -6.06047 | -1.27059 | -0.37171 |
| H        | -6.97593 | -1.82679 | -0.51895 |
| C        | -6.11308 | 0.08837  | -0.03119 |

|          |          |          |          |
|----------|----------|----------|----------|
| H        | -7.07064 | 0.57760  | 0.08349  |
| H        | -5.03152 | 1.85162  | 0.42127  |
| H        | -4.78729 | -2.93784 | -0.77958 |
| <b>7</b> |          |          |          |
| C        | 2.54660  | -1.31393 | 0.06843  |
| C        | 2.58515  | 1.13113  | -0.05943 |
| C        | 1.13224  | -1.22582 | 0.05812  |
| N        | 0.48410  | -0.09635 | -0.00100 |
| C        | 1.16671  | 1.11275  | -0.06464 |
| H        | 0.54502  | -2.13276 | 0.09959  |
| Au       | -1.60429 | -0.20186 | 0.01011  |
| Cl       | -1.54716 | 0.09692  | 2.31188  |
| Cl       | -1.53676 | -0.52064 | -2.28835 |
| Cl       | -3.87799 | -0.37154 | 0.02838  |
| C        | 3.30408  | -0.12062 | 0.01081  |
| C        | 4.70676  | -0.23286 | 0.02424  |
| C        | 5.31158  | -1.46851 | 0.09104  |
| C        | 4.55091  | -2.64791 | 0.14729  |
| H        | 5.04499  | -3.60776 | 0.19917  |
| H        | 5.32412  | 0.65138  | -0.01787 |
| H        | 6.39134  | -1.53146 | 0.10014  |
| C        | 3.18065  | -2.57079 | 0.13604  |
| H        | 2.57460  | -3.46605 | 0.17862  |
| C        | 3.22592  | 2.38295  | -0.12551 |
| C        | 0.44470  | 2.31396  | -0.13620 |
| C        | 1.10485  | 3.51732  | -0.20087 |
| H        | 0.53915  | 4.43657  | -0.25581 |
| C        | 2.50514  | 3.55192  | -0.19469 |
| H        | 3.02171  | 4.50037  | -0.24492 |
| H        | 4.30432  | 2.43006  | -0.12269 |
| H        | -0.63448 | 2.28308  | -0.13812 |
| <b>8</b> |          |          |          |
| C        | -0.71772 | -3.28285 | -0.66093 |
| C        | -2.19095 | -1.39410 | -0.35623 |
| C        | 0.35418  | -2.41039 | -0.60180 |
| N        | 0.18401  | -1.09349 | -0.47374 |
| C        | -1.06424 | -0.54409 | -0.46153 |
| Au       | 1.94797  | -0.13080 | 0.18544  |
| Cl       | 0.96124  | 0.09861  | 2.27396  |
| Cl       | 3.87691  | 0.80870  | 0.95699  |
| Cl       | 2.89052  | -0.46420 | -1.91884 |
| C        | -1.98478 | -2.77246 | -0.48801 |
| H        | -2.82175 | -3.45206 | -0.45568 |



|          |          |          |          |
|----------|----------|----------|----------|
| C        | -3.50309 | -0.82380 | -0.06544 |
| C        | -1.25426 | 0.89137  | -0.58433 |
| C        | -2.51818 | 1.44638  | -0.26962 |
| C        | -3.64090 | 0.57579  | 0.06959  |
| H        | -0.54242 | -4.34071 | -0.78389 |
| H        | 1.37260  | -2.76435 | -0.64062 |
| C        | -4.88599 | 1.08985  | 0.47351  |
| C        | -4.62435 | -1.64296 | 0.15813  |
| C        | -5.96721 | 0.26715  | 0.70180  |
| H        | -6.91143 | 0.69215  | 1.01361  |
| C        | -5.83962 | -1.11216 | 0.53037  |
| H        | -6.68408 | -1.76504 | 0.70257  |
| H        | -4.54435 | -2.71455 | 0.05953  |
| H        | -5.00821 | 2.15192  | 0.61653  |
| C        | -2.67207 | 2.83973  | -0.36640 |
| C        | -0.24821 | 1.73048  | -1.09627 |
| C        | -1.64728 | 3.65289  | -0.80086 |
| H        | -1.80033 | 4.72144  | -0.86674 |
| C        | -0.43378 | 3.09123  | -1.19735 |
| H        | 0.35528  | 3.71237  | -1.59697 |
| H        | -3.62042 | 3.29349  | -0.12596 |
| H        | 0.67052  | 1.30763  | -1.46939 |
| <b>9</b> |          |          |          |
| C        | 1.34397  | 2.68169  | 0.12622  |
| C        | -1.01629 | 3.14950  | -0.10333 |
| C        | 1.08822  | 1.30662  | -0.19556 |
| N        | -0.18820 | 0.87538  | -0.29018 |
| C        | -1.23972 | 1.75196  | -0.29352 |
| Au       | -0.69970 | -1.13997 | 0.15491  |
| Cl       | -1.25399 | -1.57066 | -2.07745 |
| Cl       | -1.25829 | -3.27885 | 0.73194  |
| Cl       | -0.19060 | -0.64742 | 2.36515  |
| C        | 0.28663  | 3.56994  | 0.15405  |
| H        | 0.47327  | 4.60995  | 0.39234  |
| C        | -2.11500 | 4.04709  | -0.11261 |
| C        | -2.57166 | 1.30856  | -0.47443 |
| C        | -3.60697 | 2.20435  | -0.48238 |
| H        | -4.61366 | 1.84199  | -0.63847 |
| C        | -3.38599 | 3.58726  | -0.29928 |
| H        | -4.22257 | 4.27174  | -0.30720 |
| H        | -2.76894 | 0.26254  | -0.64506 |
| H        | -1.91932 | 5.10089  | 0.03570  |
| C        | 2.23438  | 0.42891  | -0.38894 |
| C        | 2.66961  | 3.10607  | 0.47171  |
| C        | 3.69454  | 2.23265  | 0.48353  |
| H        | 4.68479  | 2.54538  | 0.78688  |

|           |          |          |          |
|-----------|----------|----------|----------|
| C         | 3.51603  | 0.88602  | 0.02487  |
| H         | 2.81143  | 4.14072  | 0.75369  |
| C         | 2.15849  | -0.81785 | -1.03619 |
| C         | 4.62551  | 0.03271  | -0.09182 |
| C         | 3.26816  | -1.62664 | -1.16516 |
| C         | 4.50484  | -1.21613 | -0.66059 |
| H         | 1.23780  | -1.13820 | -1.49451 |
| H         | 3.17438  | -2.57751 | -1.67069 |
| H         | 5.36851  | -1.86137 | -0.74629 |
| H         | 5.58843  | 0.38498  | 0.25406  |
| <b>10</b> |          |          |          |
| C         | 2.46724  | 0.55583  | 0.00023  |
| C         | 1.21510  | 2.63338  | -0.00010 |
| C         | 1.21381  | -0.14373 | 0.00043  |
| N         | 0.04542  | 0.52670  | 0.00039  |
| C         | -0.00030 | 1.88556  | 0.00018  |
| Au        | -1.76775 | -0.53698 | -0.00002 |
| Cl        | -1.71959 | -0.50950 | 2.32227  |
| Cl        | -3.74361 | -1.68483 | -0.00068 |
| Cl        | -1.71781 | -0.51005 | -2.32227 |
| C         | 2.42469  | 1.93682  | -0.00008 |
| H         | 3.33863  | 2.51312  | -0.00038 |
| C         | 1.16085  | 4.05135  | -0.00041 |
| C         | -1.22830 | 2.58807  | 0.00022  |
| C         | -1.24053 | 3.95594  | -0.00008 |
| H         | -2.18871 | 4.47544  | -0.00005 |
| C         | -0.03925 | 4.70099  | -0.00042 |
| H         | -0.07816 | 5.78119  | -0.00066 |
| H         | -2.15759 | 2.03928  | 0.00051  |
| H         | 2.09169  | 4.60300  | -0.00064 |
| C         | 1.21785  | -1.57304 | 0.00061  |
| C         | 3.71395  | -0.20055 | 0.00021  |
| C         | 3.65672  | -1.61446 | 0.00021  |
| C         | 2.38034  | -2.26206 | 0.00045  |
| H         | 2.35630  | -3.34402 | 0.00053  |
| H         | 0.27669  | -2.10025 | 0.00087  |
| C         | 4.84565  | -2.36472 | 0.00004  |
| C         | 4.97916  | 0.41101  | 0.00018  |
| C         | 6.13503  | -0.34231 | 0.00004  |
| H         | 7.09574  | 0.15422  | 0.00002  |
| C         | 6.07248  | -1.74008 | -0.00007 |
| H         | 5.06697  | 1.48731  | 0.00031  |
| H         | 4.78051  | -3.44492 | 0.00000  |
| H         | 6.98256  | -2.32381 | -0.00022 |
| <b>11</b> |          |          |          |
| C         | -3.20403 | -1.77228 | -0.38227 |

|           |          |          |          |
|-----------|----------|----------|----------|
| C         | -1.90116 | -1.40496 | -0.39489 |
| C         | -1.52366 | -0.03474 | -0.24999 |
| C         | -2.54760 | 0.94106  | -0.06620 |
| C         | -3.94586 | 0.54335  | -0.08267 |
| C         | -4.26466 | -0.82782 | -0.23061 |
| C         | -2.13523 | 2.23716  | 0.19848  |
| C         | -0.79686 | 2.60218  | 0.15624  |
| C         | 0.17829  | 1.61881  | -0.18083 |
| C         | 1.54783  | 2.05595  | -0.39681 |
| C         | 1.90626  | 3.37505  | 0.00118  |
| C         | 0.90854  | 4.28593  | 0.47384  |
| C         | -0.39285 | 3.93365  | 0.49234  |
| H         | -3.46052 | -2.81630 | -0.50639 |
| H         | -1.13871 | -2.15016 | -0.55073 |
| H         | -2.85718 | 2.99801  | 0.45776  |
| H         | 1.21637  | 5.28086  | 0.76665  |
| H         | -1.15929 | 4.63779  | 0.78738  |
| C         | 2.52445  | 1.27995  | -1.04937 |
| C         | 3.81729  | 1.73393  | -1.19960 |
| C         | 4.18858  | 2.99158  | -0.71383 |
| C         | 3.23757  | 3.80414  | -0.13995 |
| H         | 2.26068  | 0.33654  | -1.49709 |
| H         | 4.54051  | 1.11224  | -1.70857 |
| H         | 5.20849  | 3.33565  | -0.81838 |
| H         | 3.49769  | 4.80038  | 0.19304  |
| C         | -5.00360 | 1.46297  | 0.03603  |
| C         | -6.31619 | 1.04201  | 0.02429  |
| C         | -6.62600 | -0.31744 | -0.11019 |
| C         | -5.61096 | -1.23704 | -0.23879 |
| H         | -4.80047 | 2.51969  | 0.12763  |
| H         | -7.11167 | 1.76886  | 0.11623  |
| H         | -7.65827 | -0.63925 | -0.11784 |
| H         | -5.83523 | -2.28976 | -0.35113 |
| N         | -0.20952 | 0.32085  | -0.26655 |
| Au        | 1.16437  | -1.24816 | 0.15609  |
| Cl        | 1.08500  | -0.55682 | 2.37002  |
| Cl        | 2.60250  | -2.93623 | 0.70681  |
| Cl        | 1.16767  | -1.94322 | -2.07932 |
| <b>12</b> |          |          |          |
| C         | -3.65043 | 1.59454  | 0.21971  |
| C         | -2.48979 | 0.89367  | -0.22114 |
| C         | -1.19102 | 1.52775  | -0.01715 |
| C         | -1.19195 | 2.94049  | 0.18327  |

|    |          |          |          |
|----|----------|----------|----------|
| C  | -2.39557 | 3.62924  | 0.53459  |
| C  | -3.56054 | 2.95971  | 0.64036  |
| C  | 0.00008  | 3.62084  | -0.00006 |
| C  | 1.19209  | 2.94043  | -0.18333 |
| C  | 1.19112  | 1.52772  | 0.01720  |
| C  | 2.48984  | 0.89359  | 0.22125  |
| C  | 3.65051  | 1.59437  | -0.21962 |
| C  | 3.56069  | 2.95952  | -0.64034 |
| C  | 2.39575  | 3.62911  | -0.53465 |
| H  | 0.00011  | 4.70390  | -0.00009 |
| H  | 4.46318  | 3.46053  | -0.96401 |
| H  | 2.33192  | 4.68805  | -0.74604 |
| C  | 2.69420  | -0.32059 | 0.90311  |
| C  | 3.94560  | -0.89013 | 1.00808  |
| C  | 5.05902  | -0.26269 | 0.44396  |
| C  | 4.90995  | 0.97526  | -0.13854 |
| H  | 1.88140  | -0.79719 | 1.42483  |
| H  | 4.05796  | -1.82172 | 1.54456  |
| H  | 6.03505  | -0.72412 | 0.50539  |
| H  | 5.77217  | 1.51058  | -0.51411 |
| N  | 0.00004  | 0.86133  | 0.00005  |
| Au | -0.00004 | -1.26065 | 0.00000  |
| Cl | -0.70830 | -1.22628 | 2.22399  |
| Cl | -0.00028 | -3.55170 | -0.00025 |
| Cl | 0.70845  | -1.22600 | -2.22395 |
| H  | -4.46300 | 3.46077  | 0.96402  |
| H  | -2.33170 | 4.68820  | 0.74589  |
| C  | -4.90990 | 0.97551  | 0.13862  |
| C  | -2.69421 | -0.32051 | -0.90297 |
| C  | -3.94565 | -0.88997 | -1.00794 |
| C  | -5.05904 | -0.26245 | -0.44386 |
| H  | -4.05806 | -1.82156 | -1.54441 |
| H  | -1.88143 | -0.79711 | -1.42471 |
| H  | -6.03510 | -0.72380 | -0.50531 |
| H  | -5.77211 | 1.51090  | 0.51411  |

Table S3 Complete reference 39.

(39) Frisch M. J.; Trucks G. W.; Schlegel H. B.; Scuseria G. E.; Robb M. A.; Cheeseman J. R.; Scalmani G.; Barone V.; Mennucci B.; Petersson G. A.; Nakatsuji H.; Caricato M.; Li X.; Hratchian H. P.; Izmaylov A. F.; Bloino J.; Zheng G.; Sonnenberg J. L.; Hada M.; Ehara M.; Toyota K.; Fukuda R.; Hasegawa J.; Ishida M.; Nakajima T.; Honda Y.; Kitao O.; Nakai H.; Vreven T.; Montgomery J. A. Jr.; Montgomery J. A. Jr.; Peralta J. E.; Ogliaro F.; Bearpark M.; Heyd J. J.; Brothers E.; Kudin K. N.; Staroverov V. N.; Kobayashi R.; Normand J.; Raghavachari K.; Rendell A.; Burant J. C.; Iyengar S. S.; Tomasi J.; Cossi M.; Rega N.; Millam J. M.; Klene M.; Knox J. E.; Cross J. B.; Bakken V.; Adamo C.; Jaramillo J.; Gomperts R.; Stratmann R. E.; Yazyev O.; Austin A. J.; Cammi R.; Pomelli C.; Ochterski J. W.; Martin R. L.; Morokuma K.; Zakrzewski V. G.; Voth G. A.; Salvador P.; Dannenberg J. J.; Dapprich S.; Daniels A. D.; Farkas O.; Foresman J. B.; Ortiz J. V.; Cioslowski J.; Fox D. J. *Gaussian 09*, Revision B.01; Gaussian Inc., Wallingford, 2009.
